# Supplementary material for: Assessment of the incremental prognostic value from the modified frailty index-5 in complete traumatic cervical spinal cord injury
Source: PubMed Central journal article supplement (PMC10172291; doi:10.1038/s41598-023-34708-5), 2023-05-10
Supplement: 41598_2023_34708_MOESM1_ESM.pdf [file 41598_2023_34708_MOESM1_ESM.pdf]

# Assessment of the Incremental Prognostic Value from the Modified Frailty Index-5 in Complete Traumatic Cervical Spinal Cord Injury

**Husain Shakil, MD, MSc<sup>1-4</sup>, Blessing N.R. Jaja, MD, PhD<sup>2</sup>, Peng F. Zhang, BSc<sup>2</sup>, Rachael H. Jaffe<sup>2,4</sup>, Armaan K. Malhotra, MD<sup>1-4</sup>, Erin M. Harrington, BMSc<sup>2</sup>, Duminda N. Wijesundera, MD, PhD<sup>2,4,5,6</sup> Jefferson R. Wilson, MD, PhD<sup>1-4</sup>, Christopher D. Witiw, MD, MSc<sup>1-4</sup>, \***

<sup>1</sup>University of Toronto, Department of Surgery, Division of Neurosurgery, Toronto, M5T1P5, Canada

<sup>2</sup>St. Michael's Hospital, Li Ka Shing Knowledge Institute, Toronto, M5B1T8, Canada

<sup>3</sup>St. Michael's Hospital, Department of Surgery, Division of Neurosurgery, Toronto, M5B1W8, Canada

<sup>4</sup>University of Toronto, Institute of Health Policy Management and Evaluation, Toronto, M5T1P8, Canada

<sup>5</sup>St. Michael's Hospital, Department of Anesthesia, Toronto, M5B1W8, Canada

<sup>6</sup>University of Toronto, Department of Anesthesiology and Pain Medicine, Toronto, M5T1P8, Canada

\*Christopher.Witiw@unityhealth.to

---

Acute Injury Severity codes for Complete Cervical Spinal Cord Syndrome <sup>a</sup>

---

640220.5, 640221.5, 640222.5, 640224.5, 640226.5, 640228.5, 640229.6,  
640230.6, 640232.6, 640234.6, 640236.6; 640260.5, 640261.5, 640262.5,  
640264.5, 640266.5, 640268.5, 640269.6, 640270.6, 640272.6, 640274.6,  
640276.6

---

<sup>a</sup>Quadriplegia or paraplegia with no sensation

**Supplementary Table S1.** Acute Injury Severity codes used to identify complete cervical spinal cord injury patients within the Trauma Quality Improvement Program.

---

International Classification of Diseases 9 and 10 Procedural Classification System Codes

---

| Procedure     | ICD-9-PCS Codes                                                                           | ICD-10-PCS Codes                                                                                                                                                                                  |
|---------------|-------------------------------------------------------------------------------------------|---------------------------------------------------------------------------------------------------------------------------------------------------------------------------------------------------|
| Decompression | 3.01, 3.02, 3.09,<br>3.53                                                                 | ORNO, ORN1, ORN3, ORN4, ORN5, ORT3, ORT4, ORT5, ORTB, ORPO,<br>ORP1, ORP3, ORP4, ORP5, ORB0, ORB1, ORB3, ORB4, ORB5, ORW0,<br>ORW1, ORW3, ORW4, ORW5, ORW9, ORQ0, ORQ1, ORQ3, ORQ4,<br>ORQ5, 00NW |
| Fusion        | 81.00, 81.01,<br>81.02, 81.03,<br>81.30, 81.31,<br>81.32, 81.33<br>81.62, 81.63,<br>81.64 | ORG0, ORG1, ORG2, ORG4, ORH0, ORH1, ORH3, ORH4, ORH5, XRG0,<br>XRG1, XRG2, XRG4                                                                                                                   |

---

Abbreviations: ICD, International Classification of Diseases; PCS, Procedural Classification System.

**Supplementary Table S2.** International Classification of Diseases 9 and 10 Procedural Classification System Codes used to identify patients who underwent surgery related to their complete cervical spinal cord injury.

| <b>Predictor</b>             | <b>P-Value</b> |
|------------------------------|----------------|
| Age – Composite Predictor    | <0.001         |
| Age – Non-linear terms       | 0.006          |
| mFI-5 Category               | 0.001          |
| Sex                          | 0.083          |
| Ethnicity                    | 0.008          |
| Insurance                    | 0.075          |
| Mechanism of Injury          | 0.149          |
| GCS                          | <0.001         |
| Hypotension in ED (SBP < 90) | 0.215          |
| Year                         | 0.227          |
| Surgery                      | <0.001         |
| Level I trauma center        | 0.417          |
| Number of beds               | 0.688          |
| Teaching status              | 0.083          |

Abbreviations: mFI-5, Modified frailty index 5; GCS, Glasgow Coma Scale; ED, emergency department; SBP, systolic blood pressure.

**Supplementary Table S3.** Results from the analysis of variance for predictors within a multivariable logistic regression model for in-hospital mortality in patients with traumatic cervical spinal cord injury, with age modelled as a non-linear predictor for in-hospital mortality.

|                                          | $\chi^2$ | <i>P Value</i> |
|------------------------------------------|----------|----------------|
| +/- Non-linear age terms                 | 10.08    | 0.006          |
| +/- Age-mFI-5 category interaction terms | 5.21     | 0.157          |

Abbreviations: mFI-5, Modified frailty index 5.

**Supplementary Table S4.** Results from likelihood ratio test comparing models of various complexities. Models with and without non-linear terms for age are compared and demonstrate a significant difference in their log-likelihood based on the likelihood ratio test. Models with and without an interaction term for age and modified frailty index-5 (mFI-5) category are compared and fail to demonstrate a significant difference in their log-likelihood based on the likelihood ratio test.

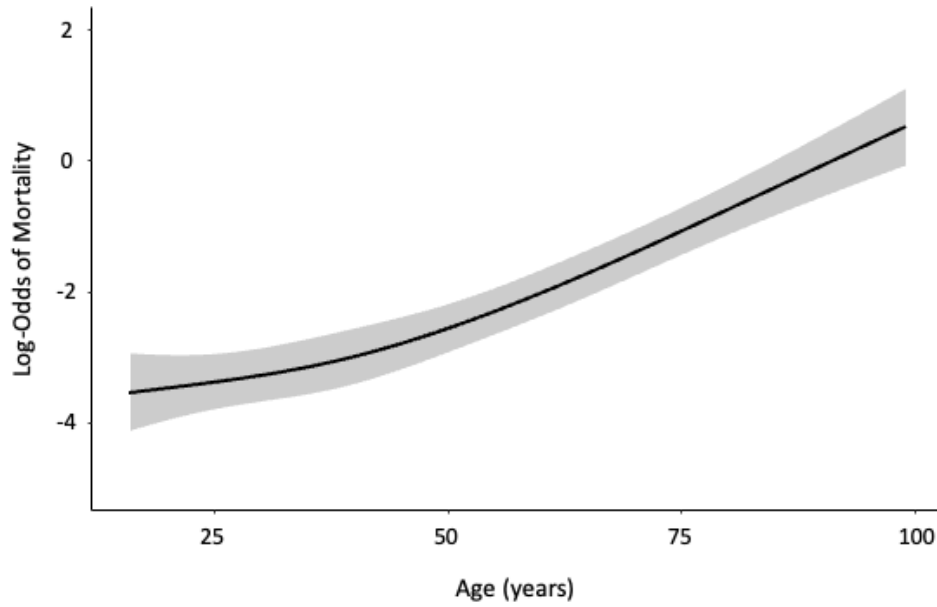

**Supplementary Figure S5.** Results from the full model demonstrating a non-linear relationship between the log-odds of in-hospital mortality and age. Plots are adjusted to: mFI-5 < 2, male sex, caucasian ethnicity, private insurance, absence of hypotension, fall as mechanism of injury, GCS 15, hospital bed size  $\leq$  200, level 1 American College of Surgeon verification level hospitals, university hospitals, injury year 2017, and patients undergoing surgery.

| <b>Predictor</b>                                           | <b>P-Value</b> |
|------------------------------------------------------------|----------------|
| Age – Composite Predictor                                  | <0.001         |
| Age – All Interactions                                     | 0.209          |
| Age – Non-linear terms                                     | 0.005          |
| mFI-5 Category – Composite Predictor                       | 0.002          |
| mFI-5 Category – All Interactions                          | 0.209          |
| Age- mFI-5 Category Interaction Term – Composite Predictor | 0.209          |
| Age- mFI-5 Category Interaction Non-linear Terms           | 0.153          |
| Sex                                                        | 0.075          |
| Ethnicity                                                  | 0.009          |
| Insurance                                                  | 0.065          |
| Mechanism of Injury                                        | 0.185          |
| GCS                                                        | <0.001         |
| Hypotension in ED (SBP < 90)                               | 0.231          |
| Year                                                       | 0.188          |
| Surgery                                                    | <0.001         |
| Level I trauma center                                      | 0.385          |
| Number of beds                                             | 0.697          |
| Teaching status                                            | 0.074          |

Abbreviations: mFI-5, Modified frailty index 5; GCS, Glasgow Coma Scale; ED, emergency department; SBP, systolic blood pressure.

**Supplementary Table S6.** Results from the analysis of variance for predictors within a multivariable logistic regression model for in-hospital mortality in patients with traumatic cervical spinal cord injury, with age modelled as a non-linear predictor for in-hospital mortality and including interaction terms between age and mFI-5.
